# Supplementary material for: Automated annotation and visualisation of high-resolution spatial proteomic mass spectrometry imaging data using HIT-MAP
Source: PubMed Central journal article supplement (PMC8163805; doi:10.1038/s41467-021-23461-w), 2021-05-28
Supplement: 41467_2021_23461_MOESM1_ESM.pdf [file 41467_2021_23461_MOESM1_ESM.pdf]

## Supplementary Information

**Automated annotation and visualisation of high-resolution spatial proteomic mass spectrometry imaging data using HIT-MAP**

Guo *et al.*

# Supplementary Figure 1

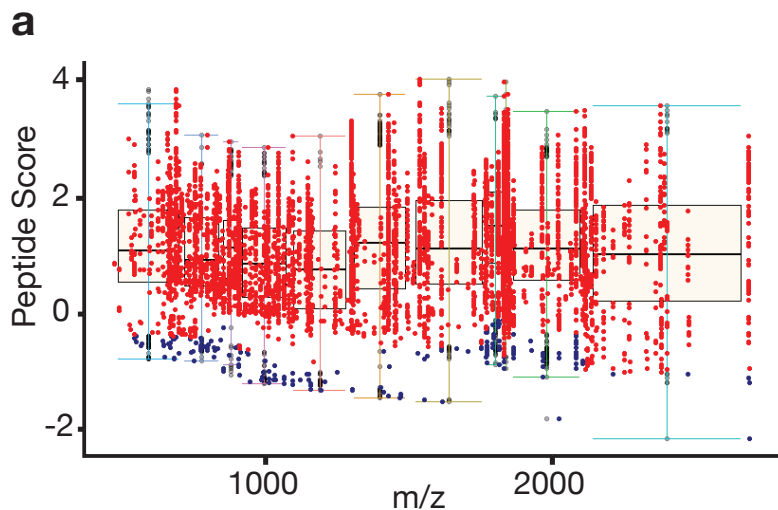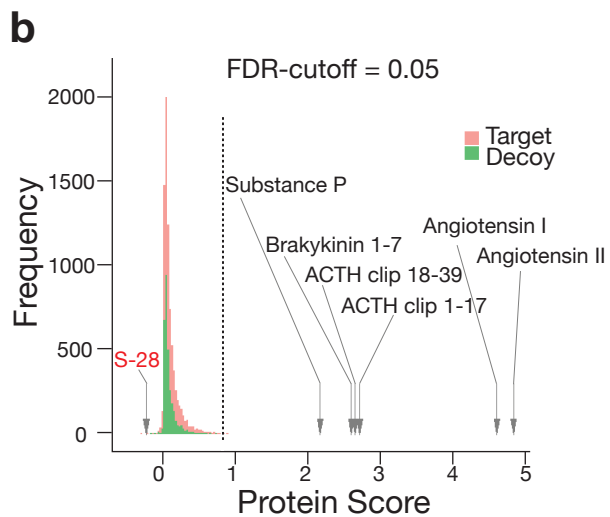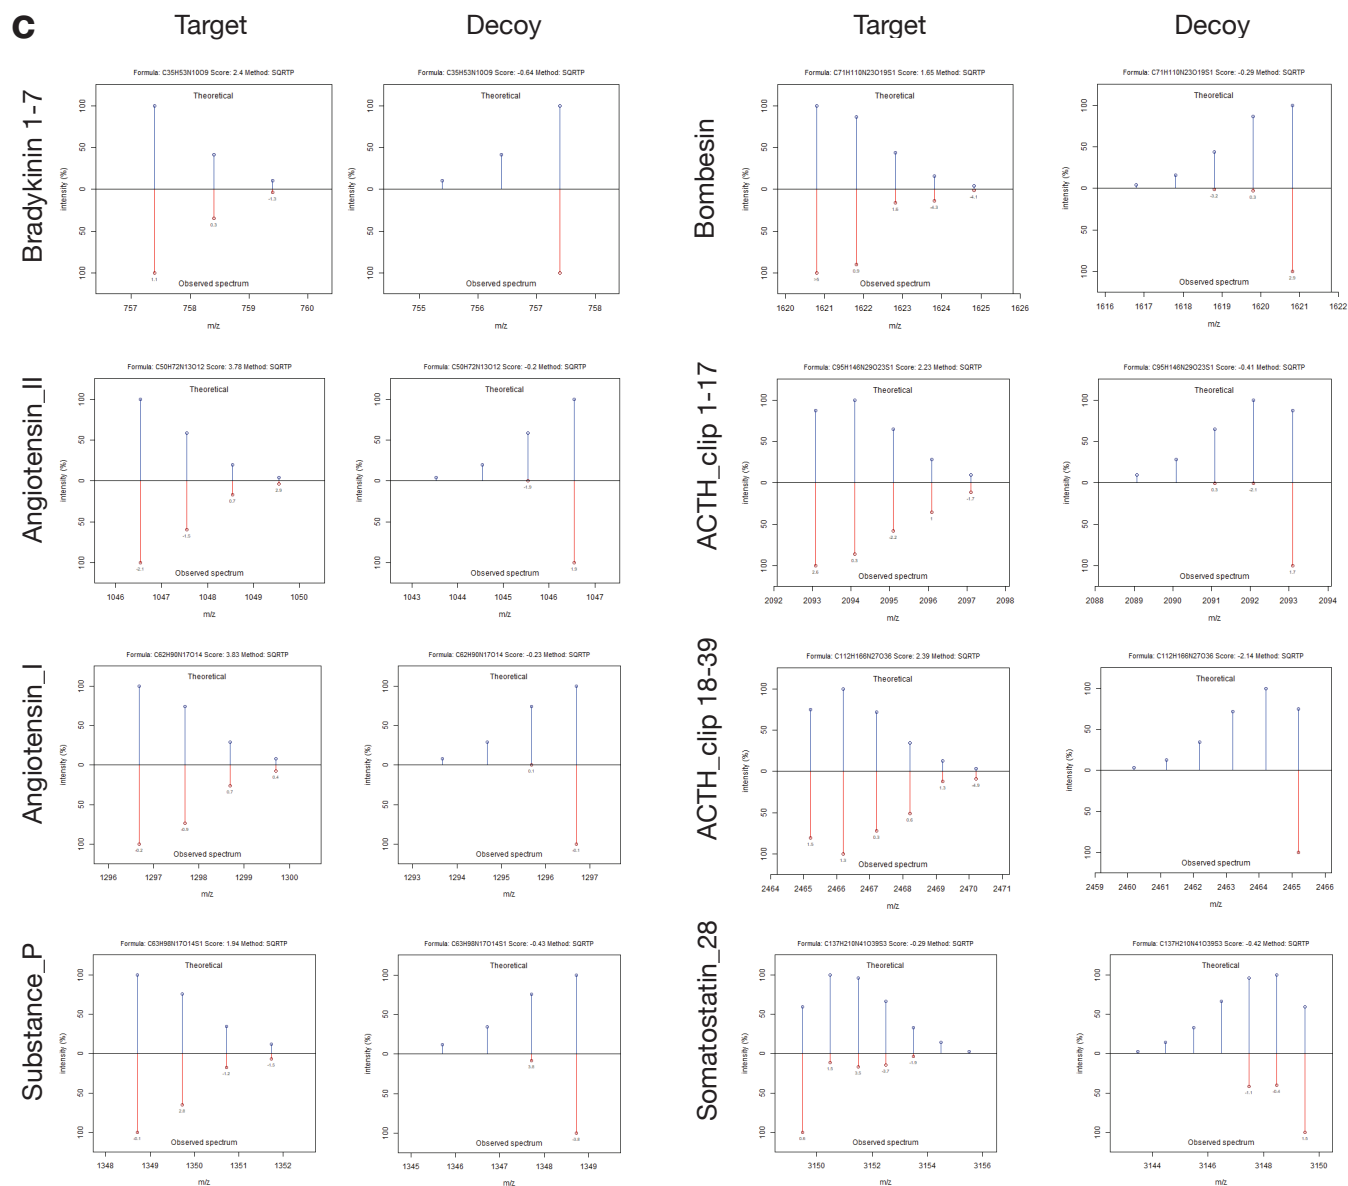

# Supplementary Figure 1 cont.

d

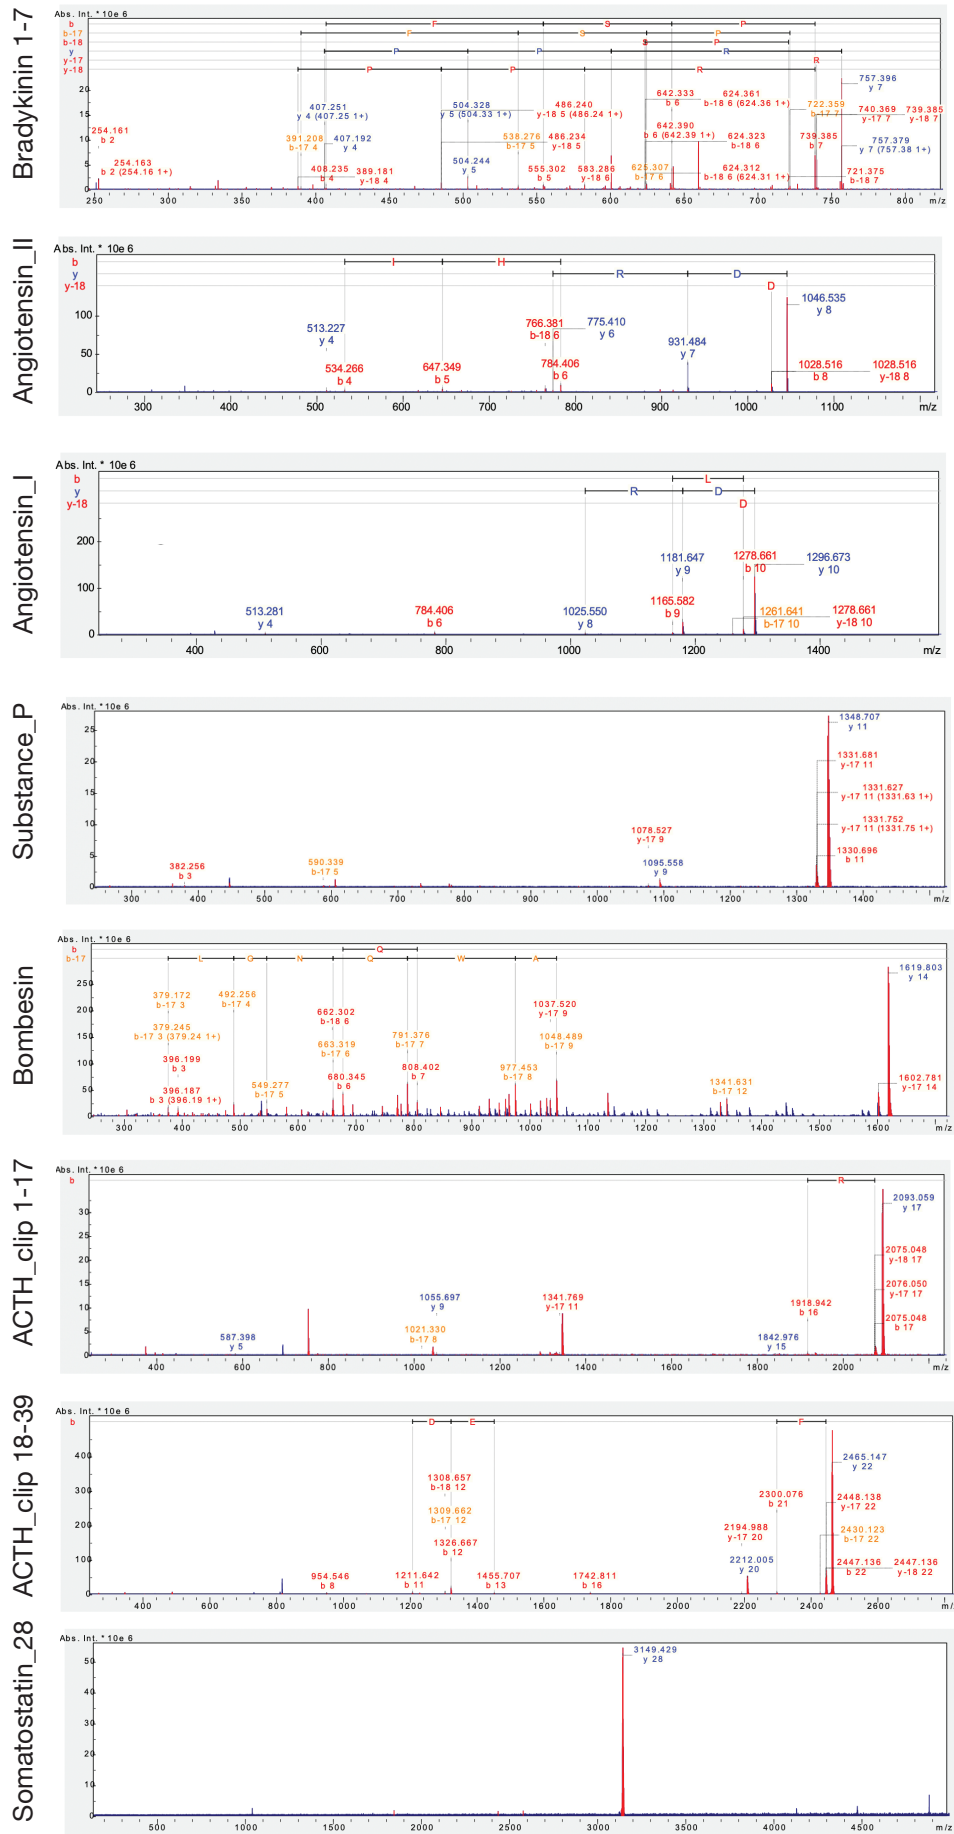

**Supplementary Figure 1** | **a.** Post-hoc IQR outlier analysis of peptide score across the mass ranges identified in the peptide calibrant identifies putative outlier peptides (blue dots) using an interquartile-range (IQR) function (box plots show minimum, maximum and interquartile range). **b.** The frequency distribution of protein candidate list scoring for the preliminary HIT-MAP analysis, annotating 7/8 proteins (excluding Somatostatin-28). **c.** The peptide mass fingerprint analysis demonstrating cross-referencing of the observed isotopic pattern to the simulated theoretical target or decoy isotopic pattern for the 8 peptide calibrants. **d.** MALDI-FT-ICR-MS/MS of the 8 peptides present with the calibrant.



# Supplementary Figure 2

## a Filensin

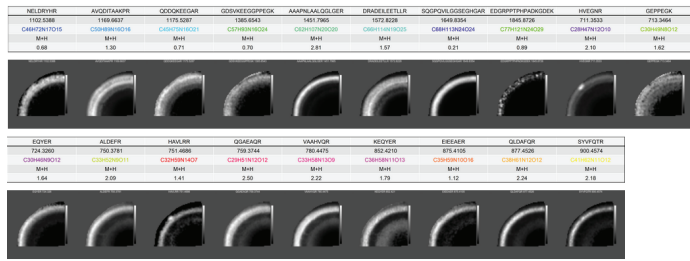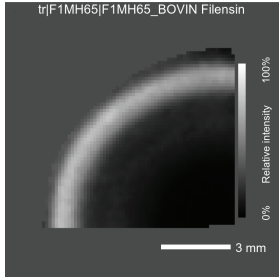

## b Phakinin

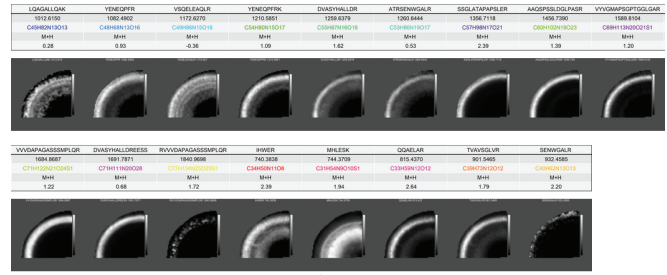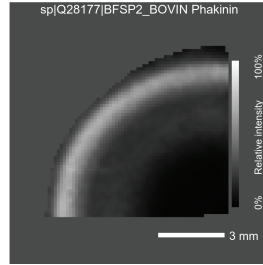

## c Alpha Crystallin A Chain

| TLGPFYPSR    | QDDHGYISR    | HFSPELTVK    | TVLDSGISEVR  | RTLGPYPSR    |
|--------------|--------------|--------------|--------------|--------------|
| 1037.542     | 1090.491     | 1172.595     | 1172.627     | 1193.643     |
| C49H73N12O13 | C45H68N10O17 | C53H82N13O17 | C49H87N14O19 | C55H85N16O14 |
| M+H          | M+H          | M+H          | M+H          | M+H          |
| 1.97         | 2.20         | 0.78         | 2.19         | 1.06         |

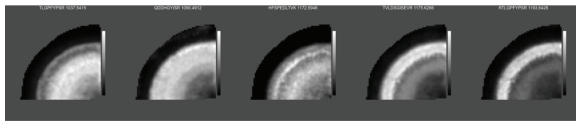

| IPSGVDAGHSER | VOEDFVEIHK   | HNERQDDHGYISR | EFHRR       |
|--------------|--------------|---------------|-------------|
| 1224.597     | 1300.653     | 1626.737      | 744.390     |
| C50H92N17O19 | C58H90N15O19 | C66H100N25O24 | C32H50N13O8 |
| M+H          | M+H          | M+H           | M+H         |
| 2.52         | 2.41         | 2.05          | 2.73        |

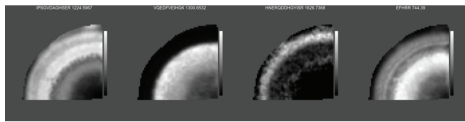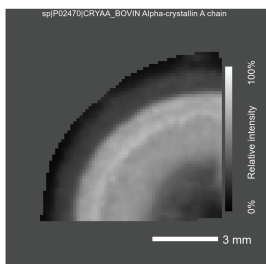

## d Alpha Crystallin B Chain

| QDEHGSR      | EKPATVAMPK   | VLSGVEYHK    | DRFSYLDK     | RPFYFSPSR    | APSWDTLSEMR  | VLSGVEYHKGEER |
|--------------|--------------|--------------|--------------|--------------|--------------|---------------|
| 108.819      | 118.028      | 118.815      | 118.821      | 134.708      | 140.893      | 178.808       |
| C48H68N10O13 | C58H74N10O19 | C58H74N10O19 | C58H74N10O19 | C58H74N10O19 | C58H74N10O19 | C48H72N12O14  |
| M+H          | M+H          | M+H          | M+H          | M+H          | M+H          | M+H           |
| 1.96         | 2.25         | 2.15         | 2.82         | 2.32         | 1.96         | 0.74          |

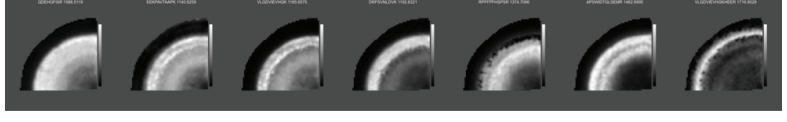

| IPADVPLATSLSSDQVTVNPK | TFYR       | EFYRK        | QASQPR       | QASQPR       | FSYLDK       | HFPPELK      |
|-----------------------|------------|--------------|--------------|--------------|--------------|--------------|
| 294.302               | 700.432    | 716.309      | 744.305      | 872.485      | 921.069      | 951.462      |
| C12H18R4O3D40         | C14H20R6O4 | C28H50N10O19 | C28H50N10O19 | C28H50N10O19 | C28H50N10O19 | C28H50N10O19 |
| M+H                   | M+H        | M+H          | M+H          | M+H          | M+H          | M+H          |
| 2.37                  | 2.55       | 2.77         | 2.60         | 2.69         | 1.47         | 1.78         |

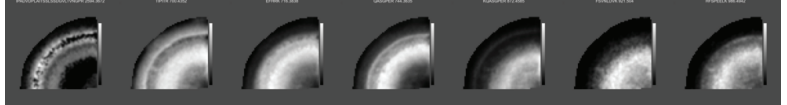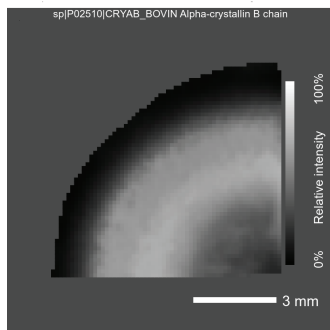

## e Beta Crystallin B2

| DMQWHQR        | TDSLSSLRPIK  | IRDMQWHQR      | RTDSLSSLRPIK  | ITLYENPFTGK  | VDSQHKITLYENPFTGK | GAFHPSS     | VDSQHK       |
|----------------|--------------|----------------|---------------|--------------|-------------------|-------------|--------------|
| 1000.4418      | 1216.6896    | 1269.6269      | 1372.7907     | 1396.7107    | 2220.0931         | 702.3206    | 842.4003     |
| C42H62N10O12S1 | C52H94N15O18 | C54H98N20O14S1 | C58H106N19O19 | C64H98N15O20 | C98H115N26O33     | C31H44N9O10 | C34H56N11O14 |
| M+H            | M+H          | M+H            | M+H           | M+H          | M+H               | M+H         | M+H          |
| 0.94           | 1.68         | 0.64           | 0.64          | 0.53         | 2.45              | 3.01        | 0.96         |

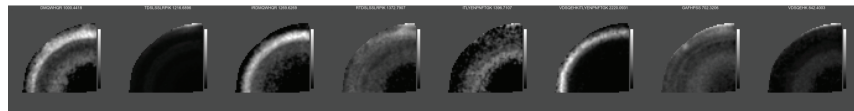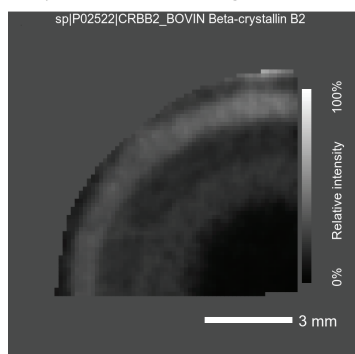



**Supplementary Figure 2** | HIT-MAP analysis of published bovine lens(Wang et al. 2020). All peptide and protein cluster imaging outputs of annotated **a-e.** lens and **f-p.** cytoskeletal proteins, (scale bar = 3mm). Intensity scales represent relative intensity from 0% to 100%.

# Supplementary Figure 3

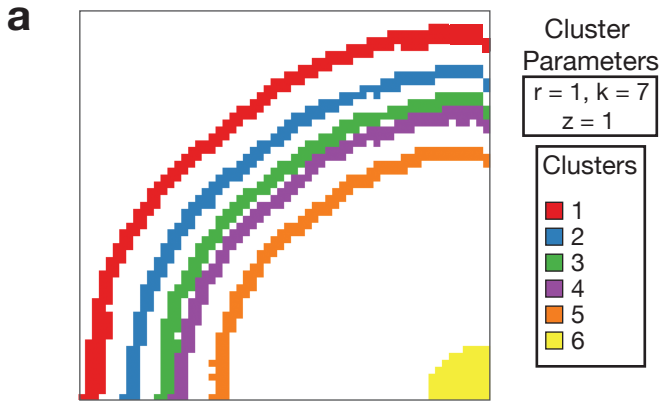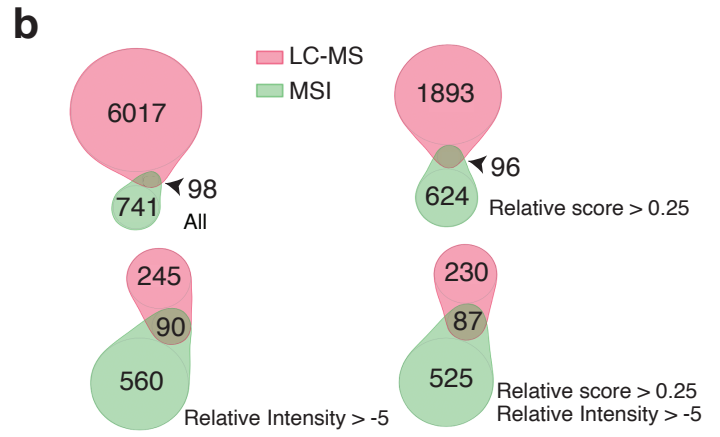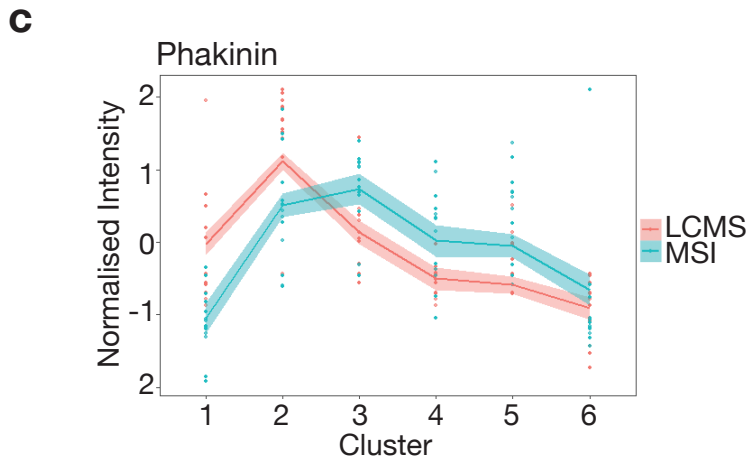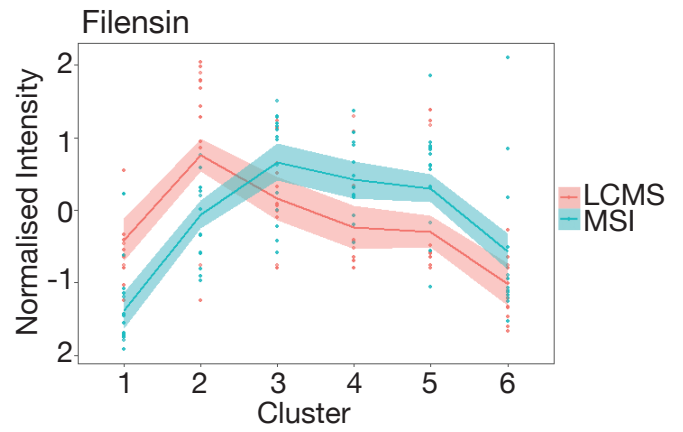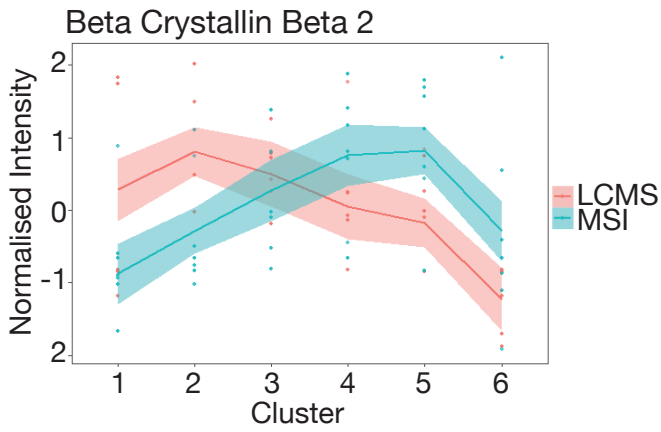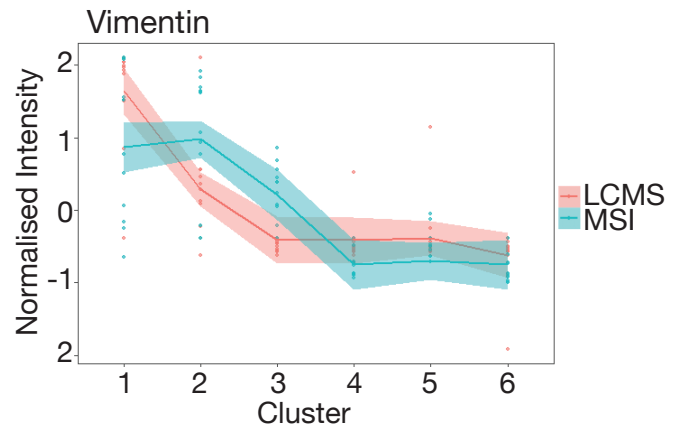

**Supplementary Figure 3** | **a.** Segmentation of published bovine lens(Wang et al. 2020) for cross-referencing to spatial microLESA captured regions that underwent LC-MS/MS on a serially sectioned bovine lens MALDI dataset. **b.** Cross-referencing of the annotated peptides from the MALDI-MSI HIT-MAP pipeline with the LC-MS dataset. The relative overlap in co-annotated peptides increases when implementing either a relative score (ii), and relative intensity (iii) or both (iv), as compared to no normalisation (i). **c.** Spatial correlation of additional LC-MS/MS validated proteins annotated by the HIT-MAP pipeline. Intensity scales represent relative intensity from 0% to 100%.

# Supplementary Figure 4

## a GABA receptor $\gamma 3$ subunit

|                    |             |
|--------------------|-------------|
| TTLGITTVLMTTLSTIAR | SGSWRR      |
| 1994.1202          | 748.3849    |
| C86H157N22O29S1    | C31H50N13O9 |
| M+H                | M+H         |
| 2.72               | 1.87        |

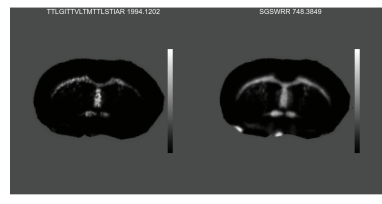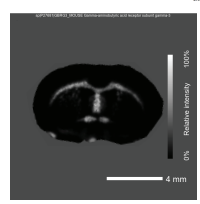

## b GABA receptor $\delta$ subunit

|               |                    |
|---------------|--------------------|
| EGGSRPGGPGGIR | VSLGITTVLMTTLMVSAR |
| 1196.613      | 1994.102           |
| C48H82N19O17  | C86H157N22O27S2    |
| M+H           | M+H                |
| -0.10         | 1.89               |

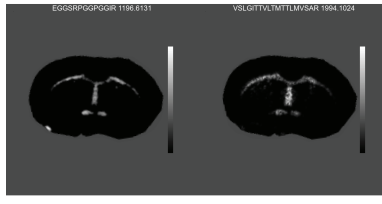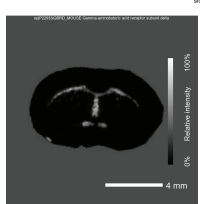

## c Neuronal acetylcholine receptor $\beta 3$ subunit

|               |                 |            |
|---------------|-----------------|------------|
| LPRWLCMK      | SSSTYHPMAPVWVKR | VYFGLK     |
| 1046.5638     | 1646.8108       | 726.4185   |
| C48H80N13O9S2 | C74H112N21O20S1 | C37H56N7O8 |
| M+H           | M+H             | M+H        |
| 1.12          | -0.59           | 1.64       |

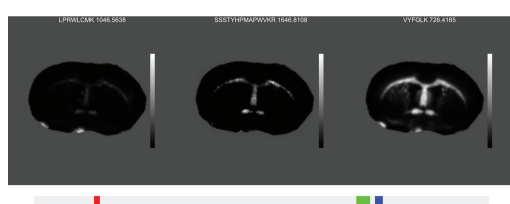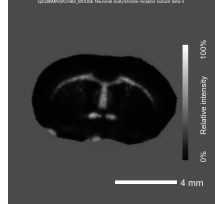

## d Endophilin-A2

|              |                 |              |
|--------------|-----------------|--------------|
| QGKIPDEELR   | MPSKSMPLDQPSCK  | ITASSSFR     |
| 1184.6270    | 1645.7746       | 868.4523     |
| C50H86N15O18 | C69H117N18O22S3 | C37H62N11O13 |
| M+H          | M+H             | M+H          |
| 0.81         | -0.02           | 1.96         |

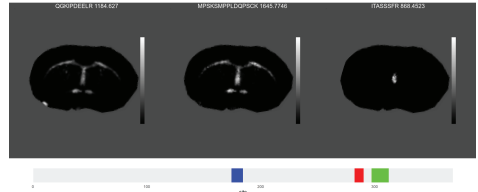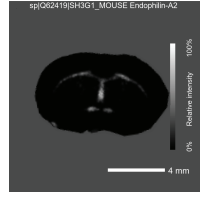

## e Endophilin-B1

|               |                    |
|---------------|--------------------|
| AAETKSSSEQELR | LGQAETELDAHLENLLSK |
| 1435.702      | 2109.119           |
| C57H99N18O25  | C91H154N25O32      |
| M+H           | M+H                |
| 0.92          | 2.77               |

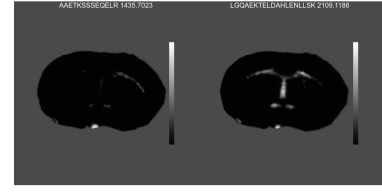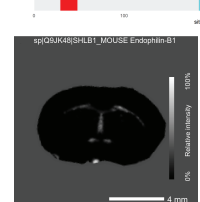

## f Syntaxin-1A

|                |             |
|----------------|-------------|
| EELEELMSDIK    | HSEIIK      |
| 1335.6348      | 726.4145    |
| C56H95N12O23S1 | C32H56N9O10 |
| M+H            | M+H         |
| -1.31          | 3.82        |

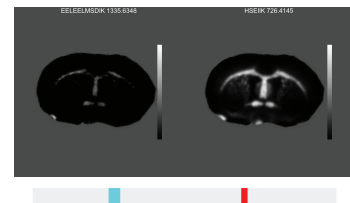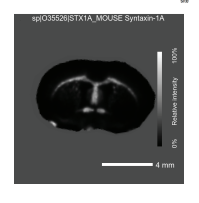

## g Vesicle-associated membrane protein 7

|                    |              |
|--------------------|--------------|
| LELLDKTENLVDSSVTFK | AMCMK        |
| 2164.1747          | 583.2401     |
| C97H163N22O33      | C22H43N6O6S3 |
| M+H                | M+H          |
| 0.12               | 0.84         |

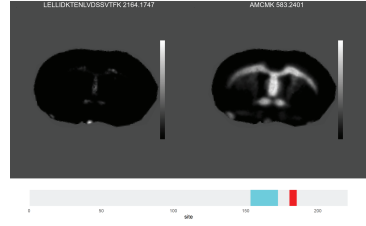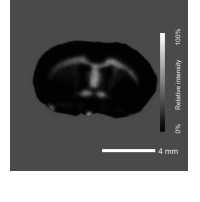

## h Vesicle-associated membrane protein 8

|              |            |
|--------------|------------|
| GENLDHLRNK   | KFWWK      |
| 1195.6178    | 794.4348   |
| C49H83N18O17 | C43H56N9O6 |
| M+H          | M+H        |
| 1.52         | -0.32      |

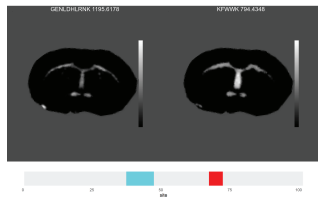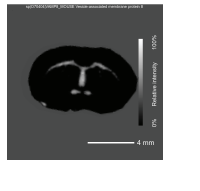

## i Protein Kinase C eta type

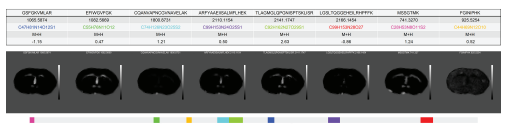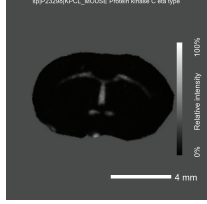

# Supplementary Figure 4 cont.

## j Smad nuclear interacting protein-1

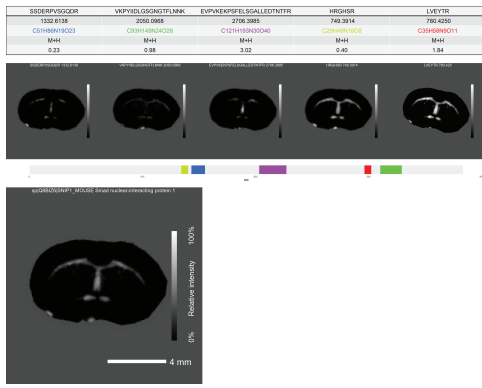

## k Cytochrome c oxidase subunit 6A1

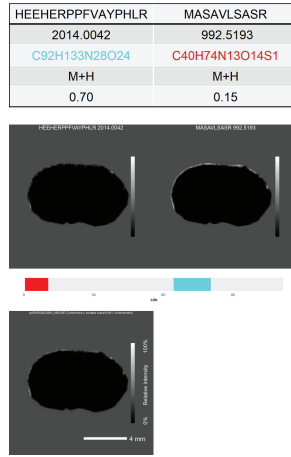

## l Pyruvate Kinase

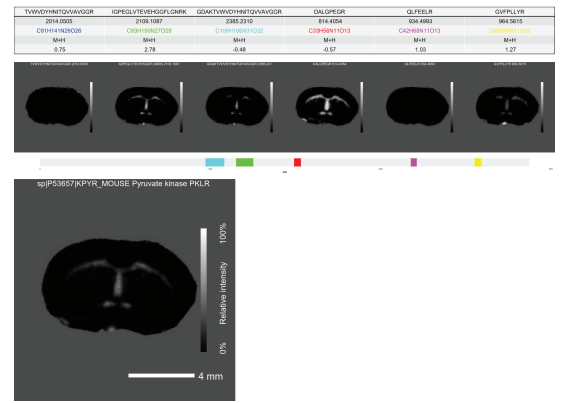

## m Neutrophilic Granule Protein

| AIEAYNQGRGRPLFR | NIYEDAKYDIIGNILK |
|-----------------|------------------|
| 1875.994        | 1881.996         |
| C82H131N28O23   | C86H137N20O27    |
| M+H             | M+H              |
| 1.19            | 1.27             |

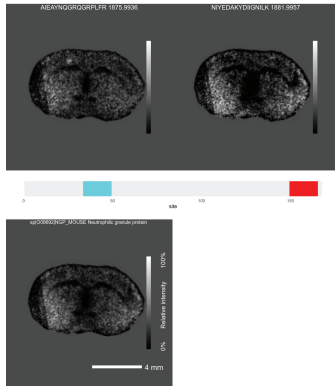

## n Small EDRK rich factor 2

| MTRGNQR        | GNQRELAR     |
|----------------|--------------|
| 862.4312       | 943.5068     |
| C32H60N15O11S1 | C37H67N16O13 |
| M+H            | M+H          |
| 1.45           | 2.78         |

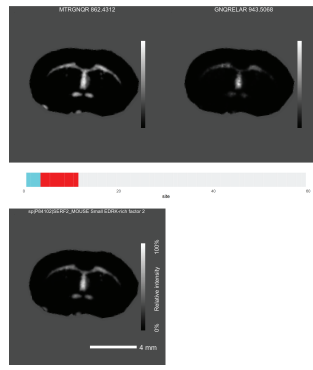

## o Disintegrin and metalloproteinase domain-containing protein 22

| QCKYIWGQK      | EQRQLPQG DYVK | YIELMIVNDHLMFKK | LWETSI      |
|----------------|---------------|-----------------|-------------|
| 1153.5823      | 1460.7492     | 1893.9965       | 748.3876    |
| C53H81N14O13S1 | C63H102N19O21 | C88H141N20O22S2 | C35H54N7O11 |
| M+H            | M+H           | M+H             | M+H         |
| 1.39           | 2.27          | 0.30            | 1.76        |

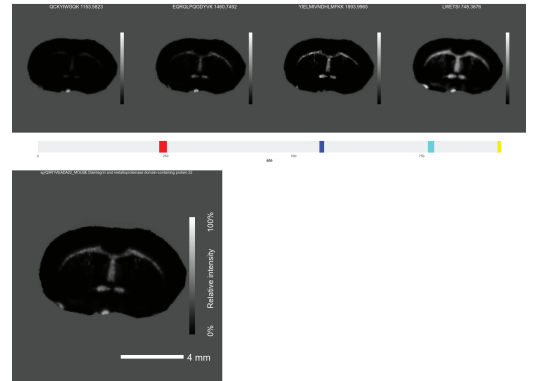

## p Hyaluronan and proteoglycan link protein 3

| YDVFCFAAALKGR   | SFGDYQGR     |
|-----------------|--------------|
| 1460.7355       | 929.4112     |
| C68H102N17O17S1 | C40H57N12O14 |
| M+H             | M+H          |
| 2.34            | 1.22         |

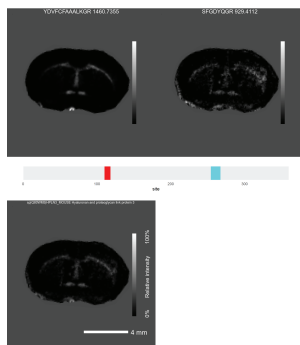

## q Wnt-2b

| ALMNLHNNR      | QGYRHATR     |
|----------------|--------------|
| 1082.5524      | 988.5071     |
| C44H76N17O13S1 | C41H66N17O12 |
| M+H            | M+H          |
| 0.27           | 2.07         |

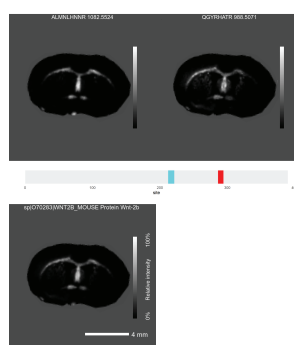

**Supplementary Figure 4** | HIT-MAP analysis of murine brain. All peptide and protein cluster imaging outputs of annotated **a-c** neural receptors, **d-h** vesicle related proteins, **i** and **j** signalling proteins, **k** and **l** metabolic proteins, **m** and **n** Alzheimer's disease related proteins, and **o-q** extracellular proteins, scale bars = 4 mm. Intensity scales represent relative intensity from 0% to 100%.



## Supplementary References

1. Wang, Z., Ryan, D. J. & Schey, K. L. Localization of the lens intermediate filament switch by imaging mass spectrometry. *Exp. Eye Res.* 108134 (2020). doi:10.1016/j.exer.2020.108134
